# Supplementary material for: Direct influence of BMPR2 mutations on cytokine patterns and biomarker effectiveness in pulmonary arterial hypertension
Source: bioRxiv or medRxiv preprint supplement (doi:10.1101/2021.05.05.21253970), 2021-05-07
Supplement: Supplementary file [file media-1.pdf]

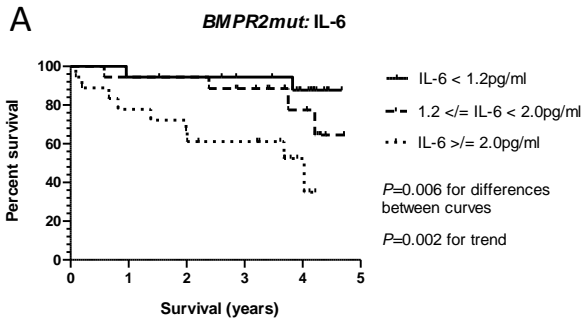

| Patients at risk                  | 0yrs | 1yr | 2yrs | 3yrs | 4yrs |
|-----------------------------------|------|-----|------|------|------|
| BMPR2mut: IL-6 < 1.2 pg/ml        | 18   | 18  | 18   | 16   | 11   |
| BMPR2mut: 1.2 <= IL-6 < 2.0 pg/ml | 18   | 18  | 17   | 14   | 08   |
| BMPR2mut: IL-6 >= 2.0 pg/ml       | 18   | 15  | 13   | 11   | 04   |

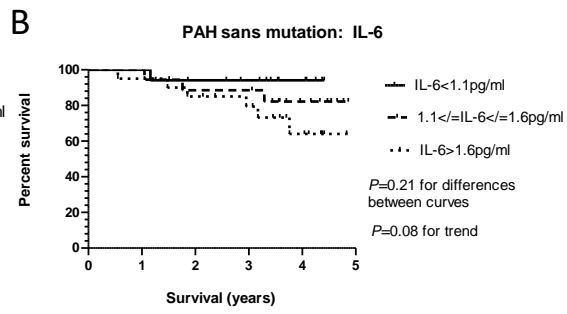

| Patients at risk                           | 0yrs | 1yr | 2yrs | 3yrs | 4yrs |
|--------------------------------------------|------|-----|------|------|------|
| PAH sans mutation: IL-6 < 1.2 pg/ml        | 17   | 17  | 15   | 13   | 08   |
| PAH sans mutation: 1.2 <= IL-6 < 2.0 pg/ml | 18   | 18  | 16   | 16   | 09   |
| PAH sans mutation: IL-6 >= 2.0 pg/ml       | 20   | 20  | 18   | 16   | 08   |

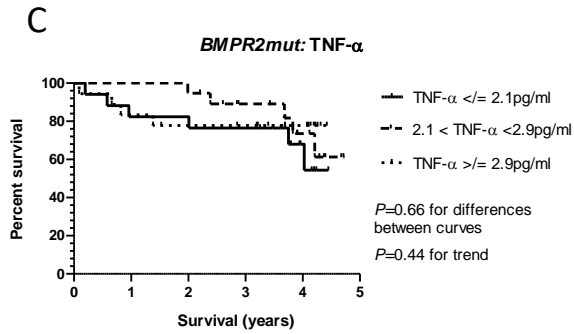

| Patients at risk                         | 0yrs | 1yr | 2yrs | 3yrs | 4yrs |
|------------------------------------------|------|-----|------|------|------|
| BMPR2mut: TNF- $\alpha$ <= 2.1pg/ml      | 17   | 15  | 15   | 14   | 06   |
| BMPR2mut: 2.1 < TNF- $\alpha$ < 2.9pg/ml | 19   | 19  | 19   | 14   | 08   |
| BMPR2mut: TNF- $\alpha$ > 2.9 pg/ml      | 18   | 16  | 14   | 13   | 09   |

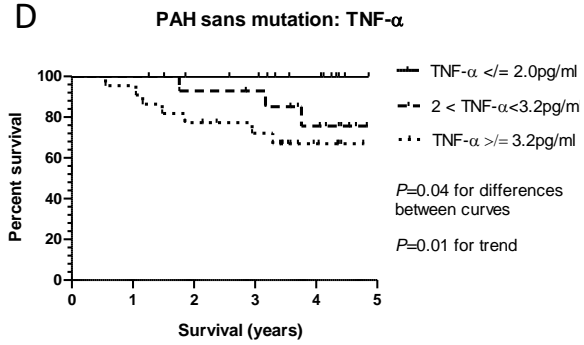

| Patients at risk                                  | 0yrs | 1yr | 2yrs | 3yrs | 4yrs |
|---------------------------------------------------|------|-----|------|------|------|
| PAH sans mutation: TNF- $\alpha$ <= 2.1pg/ml      | 17   | 17  | 16   | 15   | 11   |
| PAH sans mutation: 2.1 < TNF- $\alpha$ < 2.9pg/ml | 15   | 15  | 14   | 13   | 09   |
| PAH sans mutation: TNF- $\alpha$ > 2.9 pg/ml      | 22   | 22  | 18   | 15   | 06   |

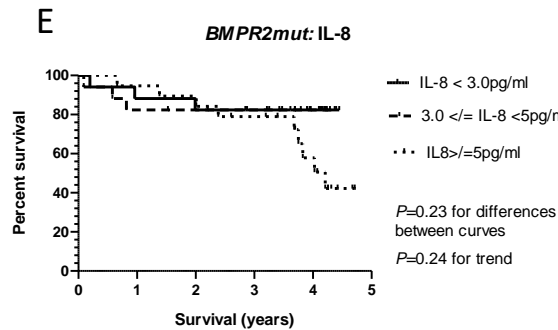

| Patients at risk                  | 0yrs | 1yr | 2yrs | 3yrs | 4yrs |
|-----------------------------------|------|-----|------|------|------|
| BMPR2mut: IL-8 < 3.0 pg/ml        | 17   | 16  | 15   | 12   | 05   |
| BMPR2mut: 3.0 <= IL-8 < 5.0 pg/ml | 17   | 15  | 14   | 13   | 09   |
| BMPR2mut: IL-8 >= 5.0 pg/ml       | 19   | 19  | 18   | 15   | 09   |

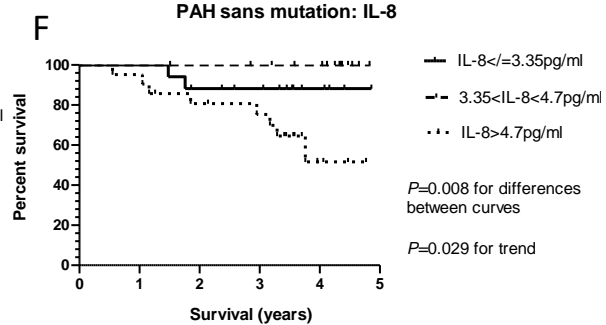

| Patients at risk                           | 0yrs | 1yr | 2yrs | 3yrs | 4yrs |
|--------------------------------------------|------|-----|------|------|------|
| PAH sans mutation: IL-8 < 3.0 pg/ml        | 17   | 17  | 15   | 13   | 07   |
| PAH sans mutation: 3.0 <= IL-8 < 5.0 pg/ml | 16   | 16  | 16   | 15   | 13   |
| PAH sans mutation: IL-8 >= 5.0 pg/ml       | 21   | 21  | 17   | 15   | 04   |

## Supplementary Figure 1

Kaplan-Meier analyses based on cytokine values. Graphs (A-B) show Kaplan-Meier curves based on tertiles of IL-6 values derived from the current cohort of *BMPR2mut* (A) and PAH sans mutation (B) patients. Graphs (C-D) show Kaplan-Meier curves based on tertiles of TNF- $\alpha$  values derived from the current cohort of *BMPR2mut* (C) and PAH sans mutation (D) patients. Graphs (E-F) show Kaplan-Meier curves based on tertiles of IL-8 values derived from the current cohort of *BMPR2mut* (E) and PAH sans mutation (F) patients.

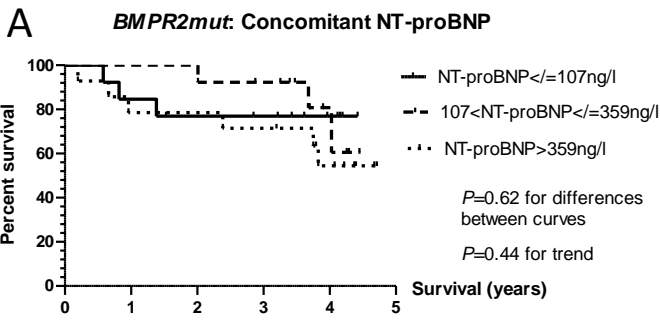

| Patients at risk                                  | 0yrs | 1yr | 2yrs | 3yrs | 4yrs |
|---------------------------------------------------|------|-----|------|------|------|
| <i>BMPR2mut</i> : NT-proBNP $\leq 107$ ng/l       | 13   | 12  | 10   | 9    | 5    |
| <i>BMPR2mut</i> : 107 < NT-proBNP $\leq 359$ ng/l | 13   | 13  | 13   | 12   | 5    |
| <i>BMPR2mut</i> : NT-proBNP > 359 ng/l            | 14   | 13  | 12   | 11   | 7    |

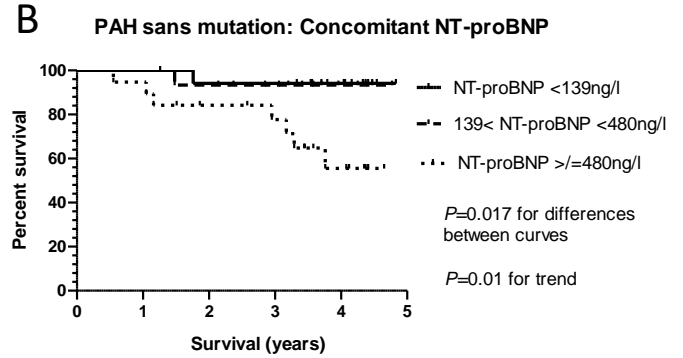

| Patients at risk                             | 0yrs | 1yr | 2yrs | 3yrs | 4yrs |
|----------------------------------------------|------|-----|------|------|------|
| PAH sans mutation: NT-proBNP < 139ng/l       | 17   | 17  | 17   | 17   | 10   |
| PAH sans mutation: 139 < NT-proBNP < 480ng/l | 16   | 16  | 15   | 12   | 6    |
| PAH sans mutation: NT-proBNP $\geq 480$ ng/l | 19   | 19  | 16   | 13   | 7    |

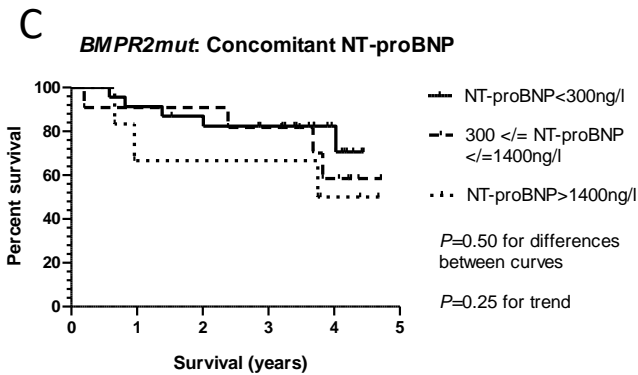

| Patients at risk                                   | 0yrs | 1yr | 2yrs | 3yrs | 4yrs |
|----------------------------------------------------|------|-----|------|------|------|
| <i>BMPR2mut</i> : NT-proBNP < 300ng/l              | 23   | 22  | 20   | 17   | 8    |
| <i>BMPR2mut</i> : 300 < NT-proBNP $\leq 1400$ ng/l | 11   | 11  | 11   | 10   | 6    |
| <i>BMPR2mut</i> : NT-proBNP > 1400ng/l             | 6    | 5   | 5    | 5    | 3    |

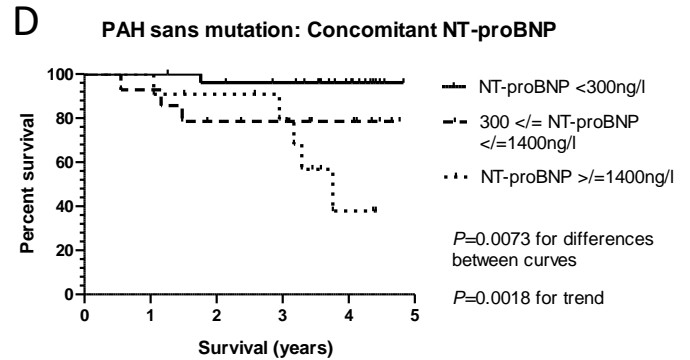

| Patients at risk                                     | 0yrs | 1yr | 2yrs | 3yrs | 4yrs |
|------------------------------------------------------|------|-----|------|------|------|
| PAH sans mutation: NT-proBNP < 300ng/l               | 27   | 27  | 26   | 24   | 12   |
| PAH sans mutation : 300 < NT-proBNP $\leq 1400$ ng/l | 14   | 14  | 11   | 9    | 7    |
| PAH sans mutation: NT-proBNP > 1400ng/l              | 11   | 11  | 10   | 8    | 3    |

## Supplementary Figure 2

Kaplan-Meier analyses based on NT-proBNP values. Graphs (A-B) show Kaplan-Meier curves

based on tertiles derived from the current cohort of *BMPR2mut* (A) and PAH sans mutation (B)

patients. Graphs (C-D) show Kaplan-Meier curves based on European Respiratory Society definitions of 'low' (<300ng/l) and 'high' (>1,400ng/l) values of NT-proBNP for *BMPR2mut* (C) and PAH sans mutation (D) patients.

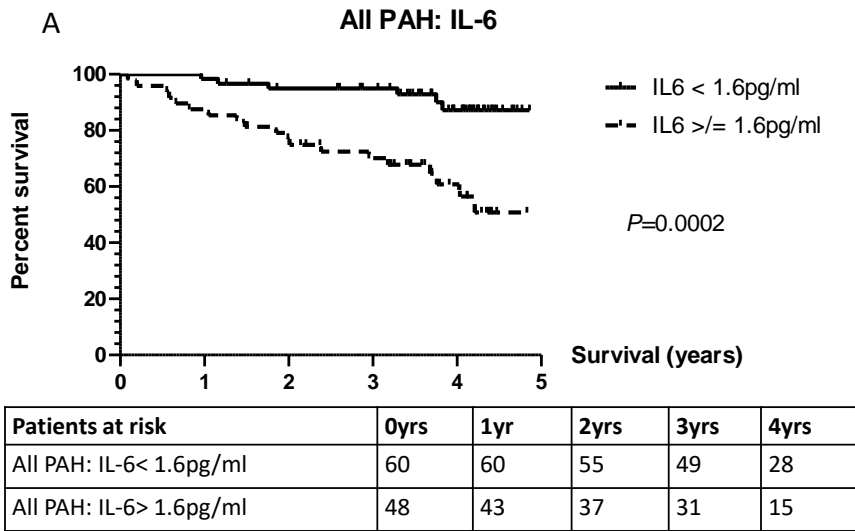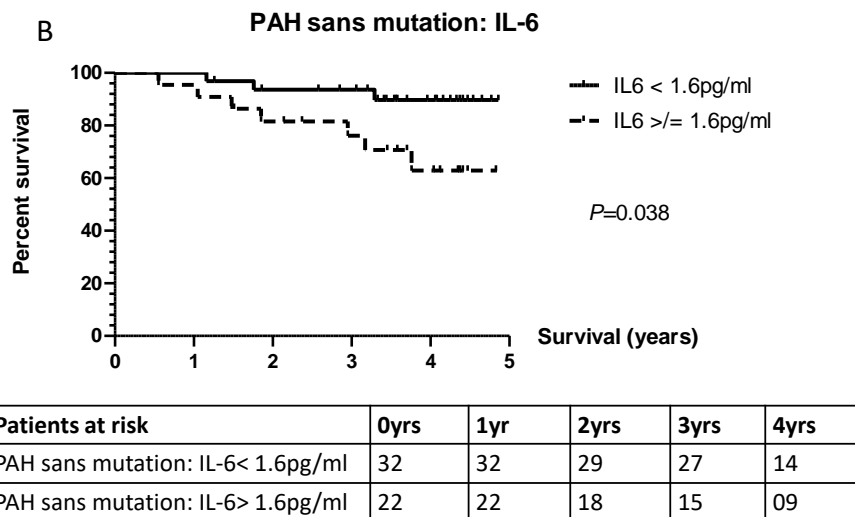

### Supplementary Figure 3

Kaplan-Meier analyses based on a proposed cut-off value of 1.6pg/ml (median value for IL-6 in the *BMPR2mut* cohort and in the IPAH Simpson cohort). Graph (A) shows a Kaplan-Meier curve from the entire group of PAH patients and graph (B) shows the corresponding analysis in PAH without driving mutations alone.
